# Supplementary material for: Sperm Selection and Embryo Development: A Comparison of the Density Gradient Centrifugation and Microfluidic Chip Sperm Preparation Methods in Patients with Astheno-Teratozoospermia
Source: MDPI journal article supplement (doi:10.3390/life11090933), 2021-09-07
Supplement: s1 [file s1]

Supplementary Materials

# Sperm Selection and Embryo Development: A Comparison of the Density Gradient Centrifugation and Microfluidic Chip Sperm Preparation Methods in Patients with Astheno-Teratozoospermia

Cagla Guler <sup>1,2</sup>, Sureyya Melil <sup>2</sup>, Umit Ozekici <sup>2,3</sup>, Yaprak Donmez Cakil <sup>4</sup>, Belgin Selam <sup>5,\*</sup> and Mehmet Cincik <sup>1,4</sup>

Table S1. Baseline characteristics of the patients (mean  $\pm$  SD)

| Age                         | BMI (kg/m <sup>2</sup> )        | Induction days            | Induction dose (mg)                 |
|-----------------------------|---------------------------------|---------------------------|-------------------------------------|
| 32.55 $\pm$ 4.68<br>(23–38) | 24.05 $\pm$ 4.89<br>(19.3–36.8) | 9.91 $\pm$ 1.41<br>(7–13) | 2952.27 $\pm$ 447.34<br>(2100–3900) |

Table S2. The number of sibling oocytes

| Patient | Number of oocytes undergoing ICSI | Number of sibling oocytes |                |
|---------|-----------------------------------|---------------------------|----------------|
|         |                                   | Microchip group           | Gradient group |
| 1       | 6                                 | 3                         | 3              |
| 2       | 3                                 | 2                         | 1              |
| 3       | 12                                | 5                         | 5              |
| 4       | 4                                 | 2                         | 2              |
| 5       | 10                                | 5                         | 5              |
| 6       | 9                                 | 4                         | 5              |
| 7       | 14                                | 7                         | 7              |
| 8       | 5                                 | 3                         | 2              |
| 9       | 9                                 | 4                         | 5              |
| 10      | 7                                 | 4                         | 3              |
| 11      | 5                                 | 3                         | 2              |
| 12      | 5                                 | 3                         | 2              |
| 13      | 23                                | 12                        | 11             |
| 14      | 9                                 | 5                         | 4              |
| 15      | 17                                | 9                         | 8              |
| 16      | 6                                 | 3                         | 3              |
| 17      | 10                                | 5                         | 5              |
| 18      | 9                                 | 4                         | 5              |
| 19      | 4                                 | 2                         | 2              |
| 20      | 13                                | 7                         | 6              |
| 21      | 11                                | 6                         | 5              |
| 22      | 12                                | 6                         | 6              |
