# Supplementary figures and images for: Sperm Selection and Embryo Development: A Comparison of the Density Gradient Centrifugation and Microfluidic Chip Sperm Preparation Methods in Patients with Astheno-Teratozoospermia
Source: MDPI journal article supplement (doi:10.3390/life11090933), 2021-09-07

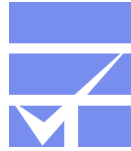

# CONSORT

TRANSPARENT REPORTING of TRIALS

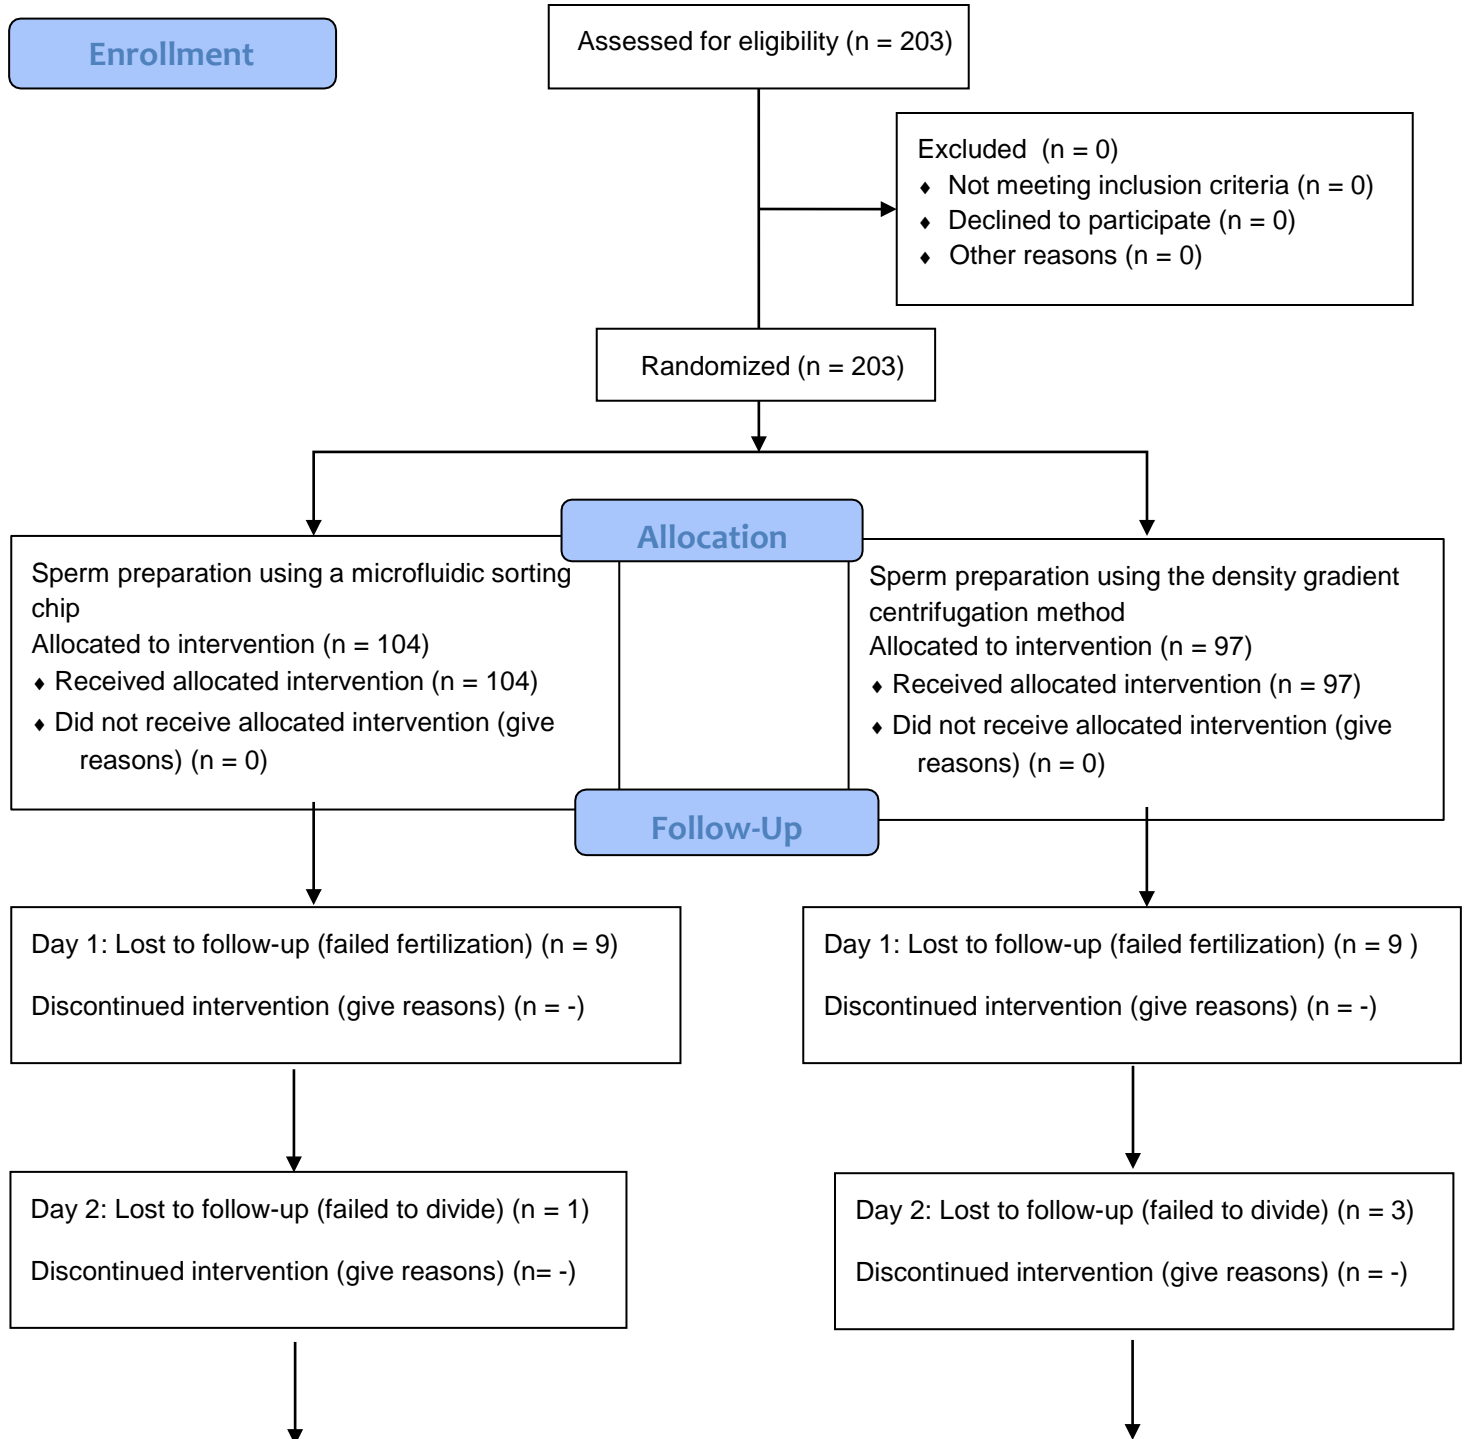

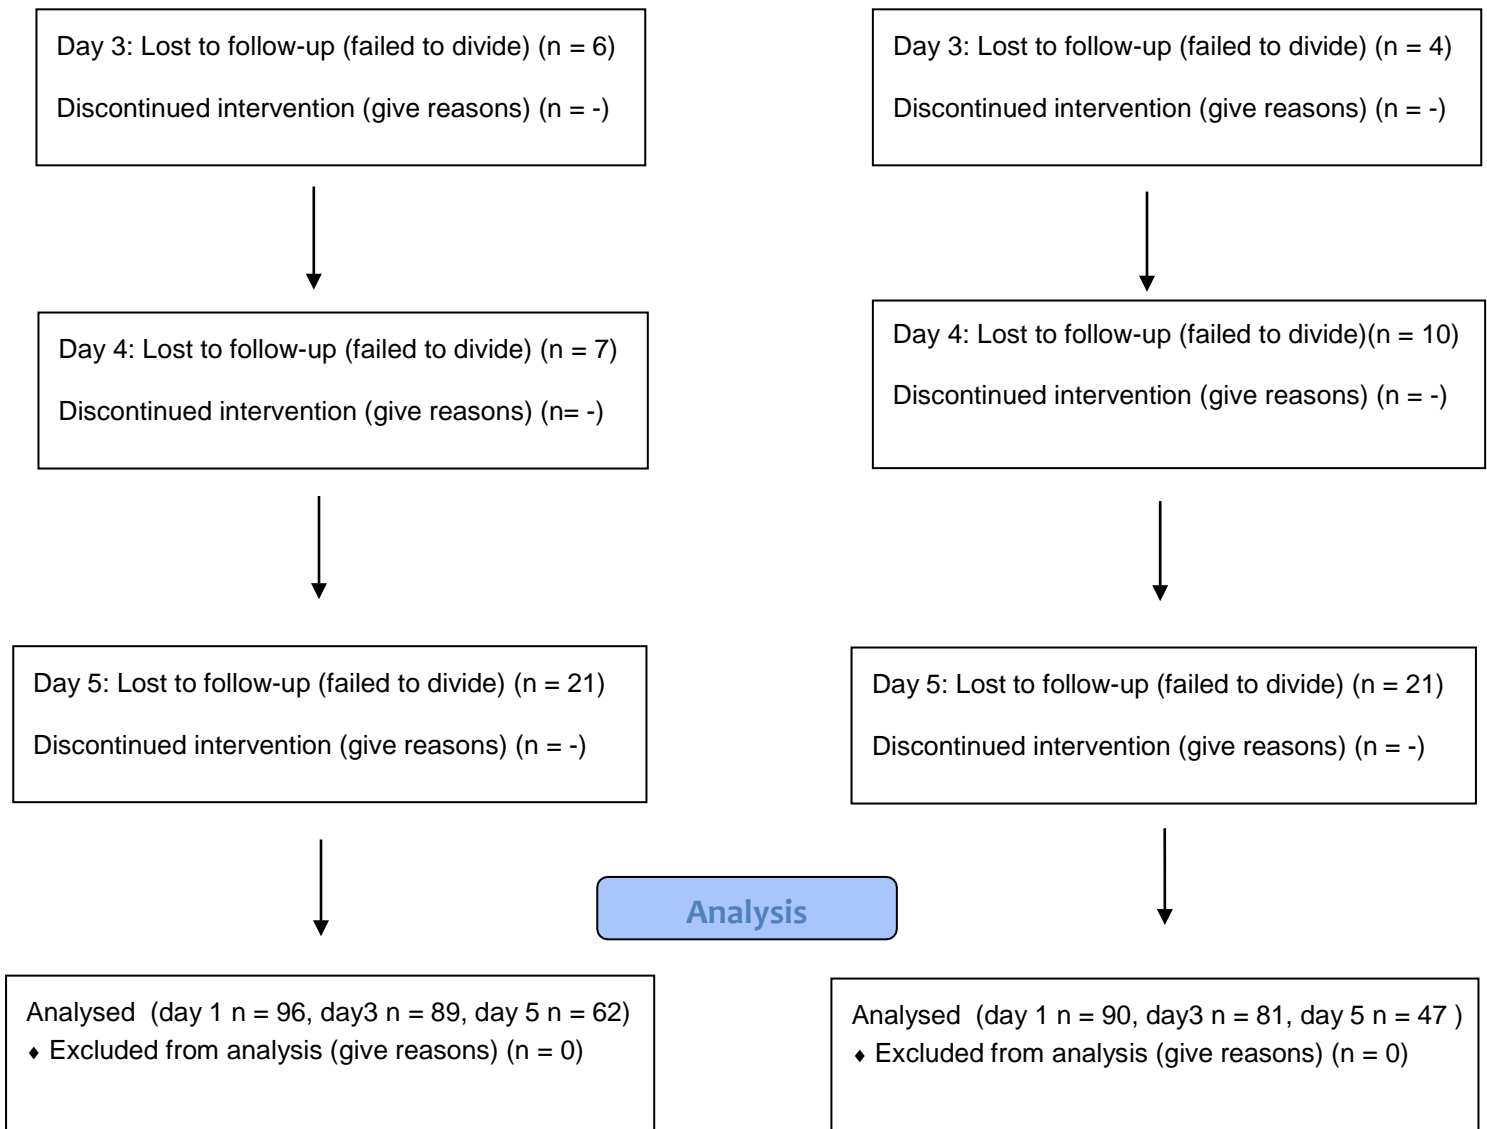

**Figure S1.** CONSORT 2010 Flow Diagram.

Supplement: s1 [file s1]
